# Supplementary material for: Synthesis of the Se-HPCF composite via a liquid-solution route and its stable cycling performance in Li–Se batteries
Source: Royal Society of Chemistry journal article supplement (doi:10.1039/d0dt03035j), 2020-01-01
Supplement: d0dt03035j1.pdf [file d0dt03035j1.pdf]

## Supporting Information

### Synthesis of Se-HPCF composite via a liquid-solution route and its stable cycling performance in Li-Se batteries

Xi Chen,<sup>‡a</sup> Lihong Xu,<sup>‡a</sup> Lingxing Zeng,<sup>\*a, c</sup> Yiyi Wang,<sup>a</sup> Shihan Zeng,<sup>a</sup> Hongzhou Li,<sup>\*a</sup> Xinye Li,<sup>a</sup> Qingrong Qian,<sup>a, c</sup> Mingdeng Wei<sup>b</sup> and Qinghua Chen<sup>a, c, d</sup>

<sup>a</sup> Engineering Research Center of Polymer Green Recycling of Ministry of Education, College of Environmental Science and Engineering, Fujian Normal University, Fuzhou, Fujian 350007, China. EMAIL: zenglingxing@fjnu.edu.cn; lihongzhou@fjnu.edu.cn; Tel: +86-591- 83465156

<sup>b</sup> Fujian Provincial Key Laboratory of Electrochemical Energy Storage Materials, Fuzhou University, Fuzhou, Fujian 350002, China.

<sup>c</sup> Fujian Key Laboratory of Pollution Control & Resource Reuse, Fuzhou, Fujian 350007, China.

<sup>d</sup> Fuqing Branch of Fujian Normal University, Fuqing, Fujian 350300, China.

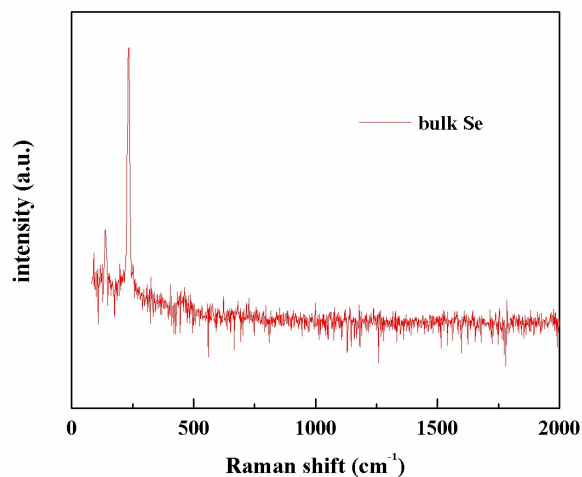

Fig. S1 Raman spectrum of Se crystals.

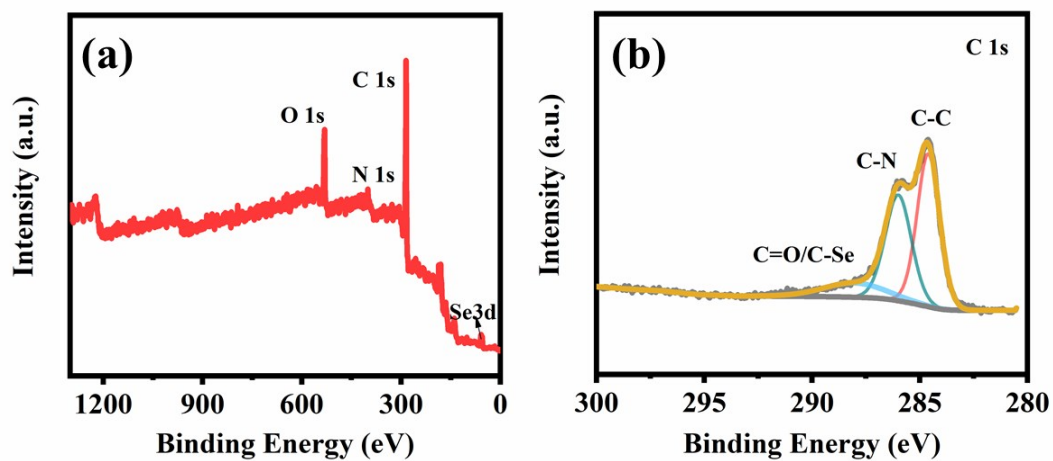

Fig. S2 High resolution XPS spectra of (a) Survey, (b) C 1s for Se-HPCF composite.

**Table S1** Electrochemical performance comparison of Se-C composites reported in the literatures with present work.

| Electrode Materials         | Current density        | Cycling capacity (mAh g <sup>-1</sup> ) | Cycle numbers(n) | Rate capability (mAh g <sup>-1</sup> ) | Ref.             |
|-----------------------------|------------------------|-----------------------------------------|------------------|----------------------------------------|------------------|
| Se/porous carbon nanofibers | 0.74 C                 | 516                                     | 900              | 637/0.147 C                            | [S1]             |
|                             |                        |                                         |                  | 306/5.9 C                              |                  |
| Se/CMCs                     | 0.2 C                  | 425.2                                   | 100              | 218.1/5 C                              | [S2]             |
|                             | 2C                     | 166.3                                   | 460              |                                        |                  |
| Se/CNSs                     | 0.1C                   | 600                                     | 100              | 700/0.1 C                              | [S3]             |
|                             | 0.5C                   | 376                                     | 1000             | ~390/10 C                              |                  |
| Se/N-CSHPC-II               | 0.2 C                  | 555                                     | 150              | 438/1 C                                | [S4]             |
|                             | 0.5 C                  | 462                                     | 200              |                                        |                  |
| Se/C/aniline                | 134 mA g <sup>-1</sup> | 462                                     | 200              | 600/67.2 mA g <sup>-1</sup>            | [S5]             |
|                             |                        |                                         |                  | 319/1.34 A g <sup>-1</sup>             |                  |
| Se/CNTs                     | 5C                     | 390                                     | 500              | 592/0.5C                               | [S6]             |
|                             |                        |                                         |                  | 390/5 C                                |                  |
| Se/PBC                      | 0.2 C                  | 509                                     | 200              | 518/0.2C                               | [S7]             |
|                             | 0.5C                   | 376                                     | 500              | 323/5 C                                |                  |
| Se-HPCF                     | <b>0.2 C</b>           | <b>533</b>                              | <b>50</b>        | <b>659/0.2C</b>                        | <b>This work</b> |
|                             | <b>5C</b>              | <b>202</b>                              | <b>2000</b>      | <b>351/5 C</b>                         |                  |

## References

- [S1] L. C. Zeng, W. C. Zeng, Y. Jiang, X. Wei, W. H. Li, C. L. Yang, Y. W. Zhu and Y. Yu, *Adv. Energy Mater.*, 2015, **5**, 1401377.
- [S2] T. Liu, M. Jia, Y. Zhang, J. Han, Y. Li, S. Bao, D. Liu, J. Jiang and M. Xu, *J. Power Sources*, 2017, **341**, 53-59.
- [S3] S. F. Zhang, W. P. Wang, S. Xin, H. Ye, Y. X. Yin and Y. G. Guo, *ACS Appl. Mater. Interfaces*, 2017, **9**, 8759–8765.
- [S4] J. P. Song, L. Wu, W. D. Dong, C. F. Li, L. H. Chen, X. Dai, C. Li, H. Chen, W. Zou, W. B. Yu, Z. Y. Hu, J. Liu, H. E. Wang, Y. Li and B. L. Su, *Nanoscale*, 2019, **11**, 6970-6981.
- [S5] S. Lee, H. Lee, N. Ha, J. T. Lee, J. Jung and K. Eom, *Adv. Funct. Mater.*, 2020, **30**, 2000028.
- [S6] N. Feng, K. Xiang, L. Xiao, W. Chen, Y. Zhu, H. Liao and H. Chen, *J. Alloy. Compd.*, 2019, **786**, 537-543.
- [S7] C. Ma, H. Wang, X. Zhao, X. Wang, Y. Miao, L. Cheng, C. Wang, L. Wang, H. Yue and D. Zhang, *Energy Technol.*, 2020, **8**, 1901445.
